# Supplementary material for: Growing Heart Valve Implants for Children
Source: MDPI journal article supplement (doi:10.3390/jcdd10040148), 2023-03-31
Supplement: s1 [file s1]

## SEARCH STRATEGY

### **PubMed (U.S. National Library of Medicine, National Institutes of Health):**

((("Tissue Engineering"[Mesh]) AND "Heart Valve Prosthesis"[Mesh]) AND ("Heart Valves/abnormalities"[Mesh] OR "Heart Valves/growth and development"[Mesh] OR "Heart Valves/surgery"[Mesh] OR "Heart Valves/transplantation"[Mesh] )

- Filters/limits: English
- Date searched: October 24, 2022
- Number of records identified: 98

Inclusion criteria: heart valve implants with growth potential, preclinical large animal studies, clinical trials in pediatric patients

Exclusion criteria: mechanical valves, cryopreserved homografts, clinical trials in adult patients
